# Supplementary material for: Description of Ultra-Processed Food Intake in a Swiss Population-Based Sample of Adults Aged 18 to 75 Years
Source: MDPI journal article supplement (doi:10.3390/nu14214486), 2022-10-25
Supplement: s1 [file s1]

## Supplementary Materials

### Description of ultra-processed food intake in a Swiss population-based sample of adults aged 18 to 75 years

Valeria A. Bertoni Maluf et al.

**Table S1.** Eighteen foods groups and examples of foods from each food group

| N° | Food groups                              | Examples                                                                                                                                                                                                                                                                                                              |
|----|------------------------------------------|-----------------------------------------------------------------------------------------------------------------------------------------------------------------------------------------------------------------------------------------------------------------------------------------------------------------------|
| 1  | Cereal products, legumes & potatoes      | Tubers and tuber products; Pasta and pasta products; Flours and starches; Dough; Rice; Bread and bread products (fresh or <b>pre-packaged bread</b> ); Legumes; Crackers; Cereal flakes (natural).                                                                                                                    |
| 2  | Fruit & vegetables                       | All types of fruits.<br>Except: fruit juices, fruit jams or candied fruits.<br>All types of vegetables (green salads/leaves, sprouts, mushrooms and seaweeds, sweet corn, snow peas, pumpkin, fresh green beans, onions).<br>Except: avocados, olives, herbs, vegetable juices or sauces (e.g. Ketchup, pesto sauce). |
| 3  | Dairy products                           | Milk and milk products; Yogurt (plain or <b>flavoured yogurt</b> ) and yogurt products; Cheese.                                                                                                                                                                                                                       |
| 4  | Meat, fish & eggs                        | Unprocessed meat; Fish and seafood; Eggs.<br><b>Processed meat; Processed fish products.</b>                                                                                                                                                                                                                          |
| 5  | Added fats                               | Vegetable oils; Butter; <b>Margarine</b> ; Cream.                                                                                                                                                                                                                                                                     |
| 6  | Nuts & seeds                             | Nuts and seeds; Avocados; Olives.                                                                                                                                                                                                                                                                                     |
| 7  | Industrial dishes                        | Vegetarian products and meals (Falafel); Rolls and croissants with spreads or fillings, savoury pies.                                                                                                                                                                                                                 |
| 8  | Soups & broth                            | All soups and broth (homemade and <b>industrial</b> ).                                                                                                                                                                                                                                                                |
| 9  | Juices & soft drinks                     | <b>Soft drinks</b> (sugary and sugar-free); <b>Sports drinks, energy drinks, fizzy drinks</b> , iced tea, diluted syrup; Fruit and vegetable juices.                                                                                                                                                                  |
| 10 | Other non-alcoholic beverages            | Coffee, tea, fruit and herbal tea; Water.                                                                                                                                                                                                                                                                             |
| 11 | Alcoholic beverages & substitutes        | Alcohol beverages (beer, wine, spirits, cocktails); <b>Alcoholic drink substitutes</b> (alcohol-free beers, punch and cider, all without alcohol).                                                                                                                                                                    |
| 12 | Sugar, honey, jam, sweet sauces & syrups | Sugar; Honey; Marmalade; Jam; Sweet sauces and syrups.                                                                                                                                                                                                                                                                |
| 13 | Ice-creams & milk-based desserts         | Milk-based and water-based ice creams and milk-based desserts (crème brûlée, chocolate mousse).                                                                                                                                                                                                                       |
| 14 | Breakfast cereals                        | <b>Breakfast cereals</b> (processed and branded breakfast cereals).                                                                                                                                                                                                                                                   |
| 15 | Confectionary, cakes & biscuits          | Chocolate and confectionery; Cakes, sweet pies and pastries; Biscuits (homemade or <b>pre-packaged biscuits</b> ).                                                                                                                                                                                                    |
| 16 | Salty snacks                             | <b>Ready-to-eat salty snacks</b> (All types of crisps and flips, salty crackers, salty popcorn, etc.).                                                                                                                                                                                                                |
| 17 | Seasoning, spices, yeast & herbs         | All sauces (homemade and <b>industrial sauces</b> ); Spices, herbs and flavourings; Vinegar.                                                                                                                                                                                                                          |
| 18 | Other foods                              | Tofu and <b>meat substitutes</b> ; Yeast; Added <b>artificial sweeteners</b> ; Cream substitutes.                                                                                                                                                                                                                     |

\*Ultra-processed food examples are in **bold**.

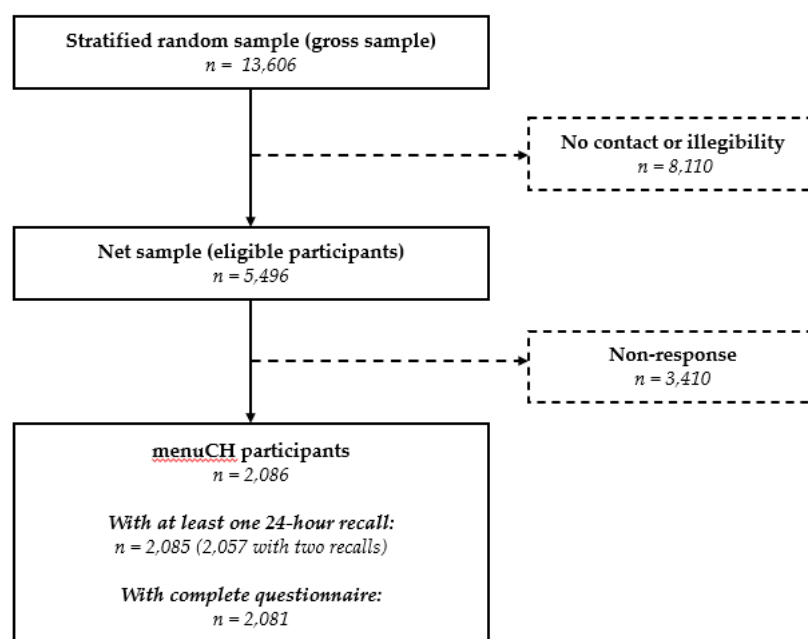

**Figure S1.** Flowchart showing causes of participants exclusion from analyses (menuCH, Swiss National Nutrition Survey, 2014-15).

**Table S2.** Distribution of daily total intake (grams/day) and intake from UPFs (grams/day) by food group in decreasing order (N=2,085, **bold** = 3 largest numbers, *italic* = 3 smallest number, by column).

| Food Groups                              | Total intake<br>(g/day) | Contribution to total diet<br>weight (%TDW) | UPFs intake<br>(g/day) | UPFs intake<br>from total intake (%) <sup>1</sup> | UPF intake from total<br>diet weight (%TDW) <sup>2</sup> |
|------------------------------------------|-------------------------|---------------------------------------------|------------------------|---------------------------------------------------|----------------------------------------------------------|
|                                          | <i>Mean (SD)</i>        | <i>Mean (SD)</i>                            | <i>Mean (SD)</i>       | <i>Mean (SD)</i>                                  | <i>Mean (SD)</i>                                         |
| Juices & soft drinks                     | 277 (408)               | 8.0 (10.8)                                  | <b>210 (387)</b>       | 58.9 (43.5)                                       | <b>26.0 (30.6)</b>                                       |
| Confectionary, cakes & biscuits          | 51 (57)                 | 1.5 (1.8)                                   | <b>50 (56)</b>         | <b>99.6 (50.4)</b>                                | <b>15.9 (19.0)</b>                                       |
| Dairy products                           | 219 (193)               | 6.5 (5.5)                                   | <b>48 (87)</b>         | 18.7 (28.2)                                       | <b>11.1 (18.9)</b>                                       |
| Meat, fish & eggs                        | 132 (96)                | 3.9 (2.8)                                   | 38 (49)                | 31.2 (32.2)                                       | 10.9 (15.5)                                              |
| Cereal products, legumes & potatoes      | <b>281 (147)</b>        | <b>8.4 (4.4)</b>                            | 25 (37)                | 10.5 (15.9)                                       | 7.8 (13.1)                                               |
| Seasoning, spices, yeast & herbs         | 49 (49)                 | 1.5 (1.4)                                   | 15 (30)                | 28.8 (35.7)                                       | 4.5 (9.6)                                                |
| Added fats                               | 32 (32)                 | 1.0 (1.0)                                   | 11 (24)                | 23.2 (31.3)                                       | 3.6 (8.6)                                                |
| Alcoholic beverages substitutes          | 188 (311)               | 5.3 (8.1)                                   | 19 (72)                | 13.2 (29.5)                                       | 3.5 (11.1)                                               |
| Other foods                              | 1 (53)                  | 0.4 (1.5)                                   | 13 (52)                | <b>96.0 (19.2)</b>                                | 3.5 (12.5)                                               |
| Soups & broth                            | 48 (101)                | 1.4 (3.0)                                   | 13 (50)                | 41.2 (47.9)                                       | 3.0 (10.9)                                               |
| Ice-creams & milk-based desserts         | 14 (35)                 | 0.4 (1.0)                                   | 9 (24)                 | 74.5 (41.9)                                       | 2.6 (7.9)                                                |
| Sugar, honey, jam, sweet sauces & syrups | 21 (26)                 | 0.6 (0.8)                                   | 7 (17)                 | 27.5 (38.7)                                       | 2.2 (6.5)                                                |
| Other non-alcoholic beverages            | <b>1751 (820)</b>       | <b>49.8 (15.4)</b>                          | 11 (70)                | 0.6 (3.5)                                         | 1.8 (9.2)                                                |
| Salty snacks                             | 5 (16)                  | 0.1 (0.5)                                   | 5 (16)                 | <b>100 (0.0)</b>                                  | 1.5 (5.3)                                                |
| Breakfast cereals                        | 7 (18)                  | 0.2 (0.5)                                   | 5 (15)                 | 65.8 (44.9)                                       | 1.4 (5.2)                                                |
| Industrial dishes                        | 5 (24)                  | 0.1 (0.7)                                   | 2 (17)                 | 40.4 (48.4)                                       | 0.5 (3.6)                                                |
| Nuts & seeds                             | 10 (21)                 | 0.3 (0.6)                                   | 0 (0)                  | 0.0 (0.0)                                         | 0.0 (0.0)                                                |
| Fruit & vegetables                       | <b>341 (226)</b>        | <b>10.1 (6.3)</b>                           | 0 (0)                  | 0.0 (0.0)                                         | 0.0 (0.0)                                                |
| Total                                    | 3,443 (981)             | 100.0                                       | 481 (463)              | -                                                 | 100.0                                                    |

<sup>1</sup> Among consumers only (N varies according to food groups, e.g., N=2,074 for Cereal products, legumes & potatoes to N=155 for Industrial recipes & fast-food dishes). <sup>2</sup> Seven people did not consume any UPFs (N<sub>total</sub>=2,078).

**Table S3.** Nutrient profile of the overall diet and of ultra-processed products (N=2,085) and missing values from the Food Composition Database, by nutrient

| Nutrients                      | Total daily intake <sup>1</sup><br>Medians (P25-P75) | Total daily intake from<br>UPFs<br>Medians (P25-P75) | Relative contribution of UPFs<br>to total intake (%) <sup>2</sup><br>Medians (P25-P75) | Missing values<br>for all foods <sup>3</sup><br>N (%) | Missing values<br>for UPFs<br>N (%) |
|--------------------------------|------------------------------------------------------|------------------------------------------------------|----------------------------------------------------------------------------------------|-------------------------------------------------------|-------------------------------------|
| <b>Proteins (g)</b>            | <b>76.0 (60.3-97.8)</b>                              | <b>15.7 (9.0-25.5)</b>                               | <b>21.0 (12.6-32.2)</b>                                                                | <b>0</b>                                              | <b>0</b>                            |
| <b>Total carbohydrates (g)</b> | <b>211.9 (164.6-273.3)</b>                           | <b>61.7 (36.0-100.4)</b>                             | <b>30.7 (19.6-43.4)</b>                                                                | <b>0</b>                                              | <b>0</b>                            |
| <b>Dietary fibre (g)</b>       | <b>18.7 (14.0-24.4)</b>                              | <b>2.7 (1.4-4.8)</b>                                 | <b>15.2 (8.1-25.9)</b>                                                                 | <b>2,822 (2.3)</b>                                    | <b>1,107 (4.8)</b>                  |
| <b>Sugars (g)</b>              | <b>94.5 (67.5-128.3)</b>                             | <b>34.0 (18.1-60.1)</b>                              | <b>39.3 (24.0-57.2)</b>                                                                | <b>3,971 (3.3)</b>                                    | <b>989 (4.3)</b>                    |
| <b>Total fats (g)</b>          | <b>83.6 (64.0-107.4)</b>                             | <b>25.4 (14.9-40.5)</b>                              | <b>31.8 (20.6-44.6)</b>                                                                | <b>0</b>                                              | <b>0</b>                            |
| PUFAs (g)                      | 7.4 (5.1-10.7)                                       | 1.3 (0.5-2.7)                                        | 19.1 (7.4-35.2)                                                                        | 25,121 (20.8)                                         | 10,002 (43.5)                       |
| MUFAs (g)                      | 21.0 (14.4-28.9)                                     | 4.3 (1.8-8.4)                                        | 22.4 (9.5-40.2)                                                                        | 25,121 (20.8)                                         | 10,002 (43.5)                       |
| <b>SFAs (g)</b>                | <b>31.0 (22.6-41.6)</b>                              | <b>9.8 (5.4-16.3)</b>                                | <b>32.8 (21.6-46.8)</b>                                                                | <b>5,027 (4.2)</b>                                    | <b>1,192 (5.2)</b>                  |
| Cholesterol (mg)               | 210.0 (135.0-320.1)                                  | 26.9 (8.3-59.2)                                      | 12.6 (4.4-28.5)                                                                        | 21,772 (18.0)                                         | 10,223 (44.4)                       |
| Calcium (mg)                   | 644.9 (455.8-896.3)                                  | 42.9 (16.5-100.0)                                    | 7.1 (2.6-14.8)                                                                         | 24,554 (20.3)                                         | 10,810 (47.0)                       |
| Chloride (mg)                  | 2674.6 (1856.5-3767.5)                               | 458.7 (148.6-1172.9)                                 | 19.4 (6.9-37.8)                                                                        | 27,795 (23.0)                                         | 11,900 (51.7)                       |
| Iodine (mg)                    | 55.4 (38.6-80.1)                                     | 4.0 (1.5-8.0)                                        | 7.2 (2.7-14.8)                                                                         | 26,707 (22.1)                                         | 11,854 (51.5)                       |
| Iron (mg)                      | 6.7 (4.8-8.9)                                        | 1.0 (0.4-1.9)                                        | 16.2 (7.3-28.4)                                                                        | 25,432 (21.0)                                         | 10,945 (47.6)                       |
| Magnesium (mg)                 | 204.5 (160.5-256.0)                                  | 23.2 (10.8-41.4)                                     | 11.4 (5.4-20.6)                                                                        | 24,658 (20.4)                                         | 10,882 (47.3)                       |
| Phosphorus (mg)                | 855.6 (649.6-1104.1)                                 | 115.8 (49.5-204.0)                                   | 13.3 (6.4-22.9)                                                                        | 25,806 (21.3)                                         | 11,237 (48.9)                       |
| Potassium (mg)                 | 2039.7 (1571.1-2577.6)                               | 229.6 (106.6-406.1)                                  | 11.7 (5.5-20.3)                                                                        | 24,906 (20.6)                                         | 11,080 (48.2)                       |
| <b>Sodium (mg)</b>             | <b>2771.0 (2079.4-3653.9)</b>                        | <b>738.2 (365.1-1304.6)</b>                          | <b>27.8 (15.8-42.9)</b>                                                                | <b>5,317 (4.4)</b>                                    | <b>1,801 (4.7)</b>                  |
| Zinc (mg)                      | 7.1 (5.1-9.8)                                        | 1.0 (0.4-1.8)                                        | 13.6 (6.2-24.6)                                                                        | 25,631 (21.2)                                         | 11,084 (48.2)                       |
| Beta-carotene (µg)             | 2,273.5 (1,033.9-4,353.3)                            | 15.3 (3.1-45.6)                                      | 0.7 (0.1-3.1)                                                                          | 31,496 (26.0)                                         | 12,534 (54.5)                       |
| Cobalamin (µg)                 | 2.9 (1.7-4.8)                                        | 0.3 (0.07-0.9)                                       | 12.7 (3.2-33.5)                                                                        | 24,564 (20.3)                                         | 10,660 (46.3)                       |
| Folate (µg)                    | 195.3 (140.3-266.8)                                  | 10.1 (3.5-23.4)                                      | 5.6 (1.7-13.1)                                                                         | 26,054 (21.5)                                         | 11,187 (48.6)                       |
| Niacin (mg)                    | 10.2 (7.3-14.8)                                      | 1.7 (0.6-3.6)                                        | 17.9 (6.7-34.5)                                                                        | 25,595 (21.1)                                         | 10,688 (46.5)                       |
| Pantothenic acid (mg)          | 3.4 (2.5-4.4)                                        | 0.4 (0.2-0.7)                                        | 12.2 (5.3-22.3)                                                                        | 24,931 (20.6)                                         | 10,905 (47.4)                       |
| Riboflavin (mg)                | 0.9 (0.7-1.2)                                        | 0.1 (0.06-0.3)                                       | 15.5 (7.4-27.4)                                                                        | 24,613 (20.3)                                         | 10,711 (46.4)                       |
| Thiamine (mg)                  | 0.8 (0.6-1.1)                                        | 0.1 (0.05-0.3)                                       | 19.3 (7.2-37.5)                                                                        | 24,619 (20.3)                                         | 10,717 (46.6)                       |
| Vitamin A (µg)                 | 570.4 (367.5-837.4)                                  | 38.6 (8.9-94.8)                                      | 6.8 (1.7-16.9)                                                                         | 25,340 (20.9)                                         | 11,095 (48.2)                       |
| Vitamin B6 (mg)                | 1.3 (0.9-1.7)                                        | 0.1 (0.1-0.3)                                        | 12.2 (4.7-24.6)                                                                        | 24,424 (20.2)                                         | 10,534 (45.8)                       |
| Vitamin C (mg)                 | 85.5 (51.2-131.5)                                    | 5.1 (1.0-14.5)                                       | 6.7 (1.1-20.0)                                                                         | 24,734 (20.4)                                         | 10,808 (47.0)                       |
| Vitamin D (µg)                 | 1.7 (1.0-2.9)                                        | 0.2 (0.1-0.6)                                        | 14.9 (3.5-36.0)                                                                        | 24,792 (20.5)                                         | 10,875 (47.3)                       |
| Vitamin E (mg-ATE)             | 7.6 (5.1-10.8)                                       | 0.9 (0.3-2.1)                                        | 12.6 (3.7-27.7)                                                                        | 24,459 (20.2)                                         | 10,739 (46.7)                       |

<sup>1</sup> Excluding all alcohol drinks. <sup>2</sup> Proportion of the total daily intake brought by UPFs. <sup>3</sup> 121,047 were consumed foods and 23,001 were classified as ultra-processed. **Nutrients with less than 5% of missing data are in bold.**

**Table S4.** Consumption of UPFs according to time to prepare and cook a hot meal at home<sup>1</sup> (N=2,080<sup>2</sup>).

| Time to prepare and cook a hot meal | Absolute intake of UPFs | UPFs consumption | P value for % UPFs <sup>3</sup> |
|-------------------------------------|-------------------------|------------------|---------------------------------|
|                                     | (Kcal/day)              | (% TEI)          |                                 |
|                                     | Mean (SD)               | Mean (SD)        |                                 |
| 30' or less (N=983)                 | 743 (473)               | 31.5 (14.4)      | <0.001*                         |
| More than 30' (N=1,097)             | 614 (391)               | 28.9 (14.0)      |                                 |

<sup>1</sup> Time to prepare and cook a hot meal at home during a usual week was categorized as 30 minutes or less and more than 30 minutes.

<sup>2</sup> Five participants did not answer this question. <sup>3</sup> Two-sample Wilcoxon rank-sum (Mann-Whitney) test.
